# Supplementary material for: Biomarkers of Cholestasis and Liver Injury in the Early Phase of Acute Respiratory Distress Syndrome and Their Pathophysiological Value
Source: MDPI journal article supplement (doi:10.3390/diagnostics11122356), 2021-12-14
Supplement: s1 [file s1]

Table S1: Results of repeated measures ANOVA including post-hoc test for all patients

| Parameter                        | Repeated measure ANOVA                | Post-hoc test (Bonferroni) |
|----------------------------------|---------------------------------------|----------------------------|
| <b>Total bilirubin</b>           | $F(1.03, 101.23) = 2.41, p = 0.371$   |                            |
| Days 0-3                         |                                       | $p = 1.0$                  |
| Days 3-5                         |                                       | $p = 0.58$                 |
| Days 0-5                         |                                       | $p = 1.0$                  |
| Days 3-10                        |                                       | $p = 1.0$                  |
| Days 5-10                        |                                       | $p = 1.0$                  |
| Days 0-10                        |                                       | $p = 1.0$                  |
| <b>Gamma glutamyltransferase</b> | $F(25.61, 59.16) = 1.44, p < 0.001^*$ |                            |
| Days 0-3                         |                                       | $p = 0.003^*$              |
| Days 3-5                         |                                       | $p < 0.001^*$              |
| Days 0-5                         |                                       | $p < 0.001^*$              |
| Days 3-10                        |                                       | $p < 0.001^*$              |
| Days 5-10                        |                                       | $p = 0.001^*$              |
| Days 0-10                        |                                       | $p < 0.001^*$              |
| <b>Aspartat aminotransferase</b> | $F(4.4, 24.0) = 3.0, p = 0.013^*$     |                            |
| Days 0-3                         |                                       | $p = 1.0$                  |
| Days 3-5                         |                                       | $p = 1.0$                  |
| Days 0-5                         |                                       | $p = 1.0$                  |
| Days 3-10                        |                                       | $p = 0.445$                |
| Days 5-10                        |                                       | $p = 0.125$                |
| Days 0-10                        |                                       | $p = 0.180$                |
| <b>Alanin aminotransferase</b>   | $F(3.12, 80.67) = 2.07, p = 0.048^*$  |                            |
| Days 0-3                         |                                       | $p = 0.014^*$              |
| Days 3-5                         |                                       | $p = 1.0$                  |
| Days 0-5                         |                                       | $p = 0.229$                |
| Days 3-10                        |                                       | $p = 1.0$                  |
| Days 5-10                        |                                       | $p = 1.0$                  |
| Days 0-10                        |                                       | $p = 1.0$                  |
| <b>mean <math>paO_2</math></b>   | $F(1.815, 95.208) = 1.73, p = 0.173$  |                            |
| Days 0-3                         |                                       | $p = 0.881$                |
| Days 3-5                         |                                       | $p = 1.0$                  |
| Days 0-5                         |                                       | $p = 0.543$                |
| Days 3-10                        |                                       | $p = 1.0$                  |
| Days 5-10                        |                                       | $p = 0.364$                |
| Days 0-10                        |                                       | $p = 1.0$                  |

|                                     |                                      |                   |
|-------------------------------------|--------------------------------------|-------------------|
| <b>lowest paO<sup>2</sup></b>       | $F(4.051, 165) = 3, p = 0.008^*$     |                   |
| Days 0-3                            |                                      | p = 0.112         |
| Days 3-5                            |                                      | p = 1.0           |
| Days 0-5                            |                                      | p = 0.208         |
| Days 3-10                           |                                      | p = 1.0           |
| Days 5-10                           |                                      | p = 1.0           |
| Days 0-10                           |                                      | <b>p = 0.036*</b> |
| <b>mean PEEP (cmH<sub>2</sub>O)</b> | $F(4.811, 87.46) = 1.9, p = 0.012^*$ |                   |
| Days 0-3                            |                                      | p = 0.238         |
| Days 3-5                            |                                      | p = 0.731         |
| Days 0-5                            |                                      | p = 0.108         |
| Days 3-10                           |                                      | p = 0.410         |
| Days 5-10                           |                                      | p = 1.0           |
| Days 0-10                           |                                      | p = 0.055         |

Table S2: Welch-Test ECMO vs. Non-ECMO treatment, data are presented as mean and standard deviation, median and interquartile range respectively as applicable

| Parameter                                    | ECMO treatment        |   |    | Non-ECMO treatment  |    |    | p-value       |
|----------------------------------------------|-----------------------|---|----|---------------------|----|----|---------------|
| Number of patients                           | 21                    |   |    | 49                  |    |    | -             |
| Age (years)                                  | 53.57 ± 13.80         |   |    | 59.58 ± 15.43       |    |    | 0.117         |
| SAPS II                                      | 40.81 ± 12.08         |   |    | 40.13 ± 12.40       |    |    | 0.785         |
| Survival (count)                             | 10                    |   |    | 41                  |    |    | <b>0.007*</b> |
| ARDS severity (Berlin-definition)            | 0                     | 9 | 12 | 4                   | 29 | 16 | <b>0.024*</b> |
| Cause of ARDS<br>(pulmonary/extra-pulmonary) | 14                    | 7 |    | 26                  | 23 |    | 0.293         |
| Days in ICU (days)                           | 21 (14- 34.5)         |   |    | 24.5 (16- 37.5)     |    |    | 0.958         |
| Days on ventilator (days)                    | 20 (12- 34.5)         |   |    | 21.5 (13.5- 27.75)  |    |    | 0.783         |
| Days free of invasive ventilation (days)     | 0 (0- 0)              |   |    | 2 (0- 4)            |    |    | 0.802         |
| mean paO <sup>2</sup> day 0                  | 89.65 (71.13- 121.10) |   |    | 82.9 (77.30- 90.43) |    |    | 0.131         |
| mean paO <sup>2</sup> day 3                  | 81.85 (72.30- 95.58)  |   |    | 88.1 (78.2- 93.18)  |    |    | 0.440         |
| mean paO <sup>2</sup> day 5                  | 80 (72.53- 84.45)     |   |    | 84.4 (75.35- 91.7)  |    |    | 0.874         |
| mean paO <sup>2</sup> day 10                 | 83.25 (76- 92.48)     |   |    | 87.6 (78.9- 98.05)  |    |    | 0.140         |

|                                        |                      |                      |               |
|----------------------------------------|----------------------|----------------------|---------------|
| lowest paO <sup>2</sup> day 0          | 53 (47.75- 71)       | 61.5 (54- 72)        | 0.791         |
| lowest paO <sup>2</sup> day 3          | 58.50 (55 – 67.5)    | 70.5 (65.27-72.25)   | 0.187         |
| lowest paO <sup>2</sup> day 5          | 63.5 (57.5- 72.5)    | 65.5 (57- 75)        | 0.514         |
| lowest paO <sup>2</sup> day 10         | 67 (57.5- 77.5)      | 70.5 (59.75- 89.2)   | 0.524         |
| mean PEEP day 0 (cmH <sub>2</sub> O)   | 12 (9.8- 13.95)      | 11.5 (9.75- 13.65)   | 0.772         |
| mean PEEP day 3 (cmH <sub>2</sub> O)   | 12 (9.4- 13.7)       | 10 (6.7- 12.25)      | <b>0.041*</b> |
| mean PEEP day 5 (cmH <sub>2</sub> O)   | 11.7 (9- 14.25)      | 10 (7.45- 12.3)      | 0.125         |
| mean PEEP day 10 (cmH <sub>2</sub> O)  | 10.9 (8.85- 12)      | 9.75 (7.95- 11.7)    | 0.535         |
| Total bilirubin day 0 (mg/dl)          | 0.6 (0.45- 0.95)     | 0.6 (0.38- 1.7)      | 0.223         |
| Total bilirubin day 3 (mg/dl)          | 0.6 (0.45- 1.15)     | 0.5 (0.38- 1.1)      | 0.843         |
| Total bilirubin day 5 (mg/dl)          | 0.8 (0.45- 2.1)      | 0.55 (0.3- 1)        | 0.273         |
| Total bilirubin day 10 (mg/dl)         | 0.9 (0.5- 2.68)      | 0.9 (0.5- 1.5)       | 0.598         |
| Gamma glutamyltransferase day 0 (U/l)  | 56 (44.5- 197.5)     | 94.5 (58.5- 202.5)   | 0.815         |
| Gamma glutamyltransferase day 3 (U/l)  | 172 (62.5- 322.5)    | 154 (89.35- 265)     | 0.757         |
| Gamma glutamyltransferase day 5 (U/l)  | 257 (126- 446)       | 202.5 (97.5- 317.25) | 0.161         |
| Gamma glutamyltransferase day 10 (U/l) | 493 (143- 767)       | 272 (128.25- 786.75) | 0.451         |
| Aspartat aminotransferase day 0 (U/l)  | 75 (51.5- 75)        | 48 (30- 116)         | 0.374         |
| Aspartat aminotransferase day 3 (U/l)  | 83.5 (47.25- 152)    | 57 (37- 107)         | 0.098         |
| Aspartat aminotransferase day 5 (U/l)  | 70.5 (50.75- 119.75) | 52.5 (32.5- 95)      | 0.198         |
| Aspartat aminotransferase day 10 (U/l) | 32.05 (32- 32.05)    | 32.1 (32.1- 32.1)    | 0.372         |
| Alanin aminotransferase day 0 (U/l)    | 31 (17.5- 96.5)      | 17.5 (34- 64.5)      | 0.748         |
| Alanin aminotransferase day 3 (U/l)    | 36 (23.5- 54.5)      | 35 (19- 77.5)        | 0.966         |
| Alanin aminotransferase day 5 (U/l)    | 49 (28.5- 79)        | 40 (16.25- 72.5)     | 0.491         |
| Alanin aminotransferase day 10 (U/l)   | 63 (30-95)           | 52.5 (20.75- 90.7)   | 0.528         |

Table S3: Welch-Test of subjects put in prone vs. subjects kept supine, data are presented as mean and standard deviation, median and interquartile range respectively as applicable

| Parameter          | Prone position | No prone position | p-value |
|--------------------|----------------|-------------------|---------|
| Number of patients | 35             | 35                | -       |

|                                              |                       |    |    |                     |    |    |               |
|----------------------------------------------|-----------------------|----|----|---------------------|----|----|---------------|
| Age (years)                                  | 56 (43- 67)           |    |    | 63 (53- 74)         |    |    | 0.148         |
| SAPS II                                      | 39.17 ± 13.90         |    |    | 41.53 ± 10.27       |    |    | 0.484         |
| Survival (count)                             | 22                    |    |    | 29                  |    |    | 0.062         |
| ARDS severity (Berlin-definition)            | 0                     | 18 | 17 | 4                   | 20 | 11 | <b>0.041*</b> |
| Cause of ARDS<br>(pulmonary/extra-pulmonary) | 20                    |    | 15 | 20                  |    | 15 | 1.0           |
| Days on ICU (days)                           | 26 (17- 38)           |    |    | 21.5 (14- 34.5)     |    |    | 0.138         |
| Days in ventilator (days)                    | 22 (15- 34)           |    |    | 21 (10.5- 27.25)    |    |    | 0.273         |
| Days free of invasive ventilation (days)     | 0 (0- 3)              |    |    | 1 (0- 2.5)          |    |    | 0.722         |
| mean paO <sup>2</sup> day 0                  | 86.95 (80.58- 111.30) |    |    | 82.25 (72- 91.03)   |    |    | 0.390         |
| mean paO <sup>2</sup> day 3                  | 88.25 (79.63- 93.83)  |    |    | 79.15 (72.98- 91.8) |    |    | 0.360         |
| mean paO <sup>2</sup> day 5                  | 79.7 (72.88- 85.5)    |    |    | 87 (76.53- 91.8)    |    |    | 0.319         |
| mean paO <sup>2</sup> day 10                 | 85.3 (78.08- 92.53)   |    |    | 91.25 (75.9- 98.58) |    |    | 0.662         |
| lowest paO <sup>2</sup> day 0                | 60 (52.75- 70)        |    |    | 60 (51.75- 72.25)   |    |    | 0.431         |
| lowest paO <sup>2</sup> day 3                | 66 (56.75- 77)        |    |    | 63.5 (59.75- 73)    |    |    | 0.775         |
| lowest paO <sup>2</sup> day 5                | 62.5 (55.75- 71.5)    |    |    | 70.5 (57.75- 77)    |    |    | <b>0.027*</b> |
| lowest paO <sup>2</sup> day 10               | 68.5 (61.75- 74.75)   |    |    | 67.5 (57.75- 82.75) |    |    | 0.938         |
| mean PEEP day 0 (cmH <sub>2</sub> O)         | 12.4 (10.7- 15)       |    |    | 10.4 (8.5- 12)      |    |    | <b>0.014*</b> |
| mean PEEP day 3 (cmH <sub>2</sub> O)         | 12 (8.8- 13.7)        |    |    | 10 (6.9- 12.03)     |    |    | 0.056         |
| mean PEEP day 5 (cmH <sub>2</sub> O)         | 10.3 (8.3- 12.9)      |    |    | 10 (7.8- 13)        |    |    | 0.511         |
| mean PEEP day 10 (cmH <sub>2</sub> O)        | 10.9 (8.7- 12)        |    |    | 9.75 (8- 11.45)     |    |    | 0.593         |
| Total bilirubin day 0 (mg/dl)                | 0.65 (0.4- 1.2)       |    |    | 0.6 (0.4- 1.35)     |    |    | 0.494         |
| Total bilirubin day 3 (mg/dl)                | 0.6 (0.4- 1.13)       |    |    | 0.5 (0.4- 0.95)     |    |    | 0.894         |
| Total bilirubin day 5 (mg/dl)                | 0.75 (0.4- 1.58)      |    |    | 0.5 (0.3- 1.1)      |    |    | 0.904         |
| Total bilirubin day 10 (mg/dl)               | 1.0 (0.5- 2.3)        |    |    | 0.9 (0.6- 1.25)     |    |    | 0.593         |
| Gamma glutamyltransferase day 0 (U/l)        | 80 (47- 196.5)        |    |    | 94.5 (43.75- 208.5) |    |    | 0.692         |
| Gamma glutamyltransferase day 3 (U/l)        | 150 (76.5- 228)       |    |    | 180 (101.5- 286)    |    |    | 0.280         |
| Gamma glutamyltransferase day 5 (U/l)        | 213 (128.5- 356)      |    |    | 206.5 (96.25- 312)  |    |    | 0.493         |
| Gamma glutamyltransferase day 10 (U/l)       | 435 (148.75- 864.5)   |    |    | 256 (70- 687)       |    |    | 0.291         |

|                                               |                    |                    |               |
|-----------------------------------------------|--------------------|--------------------|---------------|
| <b>Aspartat aminotransferase day 0 (U/l)</b>  | 83 (42- 166)       | 50 (30-84)         | <b>0.027*</b> |
| <b>Aspartat aminotransferase day 3 (U/l)</b>  | 68.5 (40.8- 138.8) | 57 (36- 91.25)     | 0.162         |
| <b>Aspartat aminotransferase day 5 (U/l)</b>  | 62.5 (40- 110)     | 61 (31- 99)        | 0.665         |
| <b>Aspartat aminotransferase day 10 (U/l)</b> | 32.1 (32.05- 32.1) | 32.1 (24.53- 32.1) | 0.394         |
| <b>Alanin aminotransferase day 0 (U/l)</b>    | 34 (17 -95)        | 33 (18- 83)        | 0.765         |
| <b>Alanin aminotransferase day 3 (U/l)</b>    | 38 (21- 65)        | 25 (19- 76)        | 0.986         |
| <b>Alanin aminotransferase day 5 (U/l)</b>    | 43 (22.5- 71)      | 43 (16.75- 85.5)   | 0.779         |
| <b>Alanin aminotransferase day 10 (U/l)</b>   | 61 (45.75- 105)    | 39 (15.5- 84.5)    | 0.096         |

Table S4: Correlations (Kendall-tau test) between measured biomarkers, general characteristics,  $paO_2$ , and PEEP. Significant correlations are marked “\*” for  $p < 0.05$ , “\*\*\*” for  $p < 0.001$ .

|                                  |             | Sever<br>ity<br>Berlin<br>defini<br>tion | Prone<br>position | Pulmon<br>al<br>cause | ECM<br>O<br>thera<br>py | Survival | mean<br>$paO_2$<br>day 0 | mean<br>$paO_2$<br>day 3 | mean $paO_2$<br>day 5 | mean<br>$paO_2$<br>day<br>10 | lowest<br>$paO_2$<br>day 0 | lowest<br>$paO_2$<br>day 3 | lowest<br>$paO_2$<br>day 5 | lowest<br>$paO_2$ day<br>10 | Mean PEEP<br>day 0 | Mean<br>PEEP<br>day 3 | Mean<br>PEEP<br>day5 | Mean PEEP<br>day 10 |
|----------------------------------|-------------|------------------------------------------|-------------------|-----------------------|-------------------------|----------|--------------------------|--------------------------|-----------------------|------------------------------|----------------------------|----------------------------|----------------------------|-----------------------------|--------------------|-----------------------|----------------------|---------------------|
| Total<br>biliru<br>bin<br>day 0  | r-<br>value | 0,119                                    | -0,006            | -0,050                | 0,025                   | -0,058   | -0,222                   | -0,069                   | -0,032                | 0,010                        | -0,108                     | 0,078                      | 0,105                      | -0,122                      | -0,051             | -0,059                | -0,105               | 0,047               |
|                                  | p-<br>value | 0,238                                    | 0,953             | 0,628                 | 0,811                   | 0,576    | 0,065                    | 0,571                    | 0,797                 | 0,941                        | 0,375                      | 0,523                      | 0,399                      | 0,371                       | 0,556              | 0,500                 | 0,240                | 0,657               |
| Total<br>biliru<br>bin<br>day 3  | r-<br>value | 0,141                                    | 0,000             | -0,097                | 0,066                   | -0,094   | -0,266                   | -0,064                   | -0,031                | 0,119                        | -0,113                     | 0,113                      | 0,071                      | 0,0056                      | -0,083             | -0,089                | -0,156               | -0,049              |
|                                  | p-<br>value | 0,162                                    | 1,000             | 0,351                 | 0,522                   | 0,365    | 0,026*                   | 0,599                    | 0,807                 | 0,383                        | 0,353                      | 0,352                      | 0,573                      | 0,970                       | 0,338              | 0,312                 | 0,081                | 0,638               |
| Total<br>biliru<br>bin<br>day 5  | r-<br>value | 0,129                                    | 0,096             | -0,178                | 0,145                   | -0,077   | -0,226                   | 0,085                    | -0,085                | 0,068                        | -0,122                     | 0,157                      | 0,065                      | 0,009                       | 0,031              | -0,009                | -0,054               | 0,022               |
|                                  | p-<br>value | 0,214                                    | 0,367             | 0,094                 | 0,170                   | 0,465    | 0,071                    | 0,503                    | 0,506                 | 0,622                        | 0,331                      | 0,211                      | 0,614                      | 0,950                       | 0,728              | 0,918                 | 0,550                | 0,834               |
| Total<br>biliru<br>bin<br>day 10 | r-<br>value | -0,143                                   | 0,069             | -0,246                | 0,044                   | -0,084   | -0,105                   | 0,208                    | -0,124                | 0,008                        | -0,066                     | 0,145                      | 0,015                      | 0,031                       | 0,028              | 0,072                 | 0,103                | 0,290*              |
|                                  | p-<br>value | 0,262                                    | 0,596             | 0,057                 | 0,735                   | 0,516    | 0,499                    | 0,175                    | 0,428                 | 0,960                        | 0,669                      | 0,349                      | 0,923                      | 0,844                       | 0,799              | 0,508                 | 0,343                | 0,013               |
| AST<br>day 0                     | r-<br>value | 0,249*                                   | 0,192             | 0,026                 | 0,148                   | 0,044    | -0,017                   | 0,004                    | -0,207                | -0,036                       | -0,148                     | -0,048                     | -0,125                     | -0,044                      | 0,152              | 0,162                 | 0,027                | -0,047              |
|                                  | p-<br>value | 0,011                                    | 0,055             | 0,798                 | 0,138                   | 0,658    | 0,892                    | 0,974                    | 0,096                 | 0,793                        | 0,222                      | 0,692                      | 0,316                      | 0,745                       | 0,069              | 0,056                 | 0,756                | 0,645               |
| AST<br>day 3                     | r-<br>value | 0,188                                    | 0,135             | 0,107                 | 0,193                   | 0,076    | -0,204                   | 0,029                    | -0,065                | -0,030                       | -0,129                     | 0,028                      | 0,046                      | -0,066                      | 0,142              | 0,188*                | 0,146                | 0,023               |
|                                  | p-<br>value | 0,069                                    | 0,196             | 0,305                 | 0,065                   | 0,469    | 0,106                    | 0,819                    | 0,618                 | 0,835                        | 0,309                      | 0,828                      | 0,721                      | 0,642                       | 0,106              | 0,033                 | 0,103                | 0,834               |
| AST<br>day 5                     | r-<br>value | 0,197                                    | 0,059             | 0,110                 | 0,157                   | 0,023    | -0,266                   | -0,008                   | -0,417                | 0,010                        | -0,230                     | 0,026                      | -0,191                     | -0,110                      | 0,174              | 0,216*                | 0,259**              | 0,191               |
|                                  | p-<br>value | 0,064                                    | 0,584             | 0,310                 | 0,146                   | 0,834    | 0,040*                   | 0,953                    | 0,001*                | 0,946                        | 0,077                      | 0,845                      | 0,151                      | 0,449                       | 0,056              | 0,018                 | 0,005                | 0,075               |
| AST<br>day 10                    | r-<br>value | 0,115                                    | 0,115             | -0,577                | -0,276                  | 0,000    | -0,302                   | 0,183                    | -0,137                | 0,297                        | -0,275                     | 0,046                      | -0,115                     | -0,068                      | -0,236             | -0,306                | -0,131               | 0,258               |
|                                  | p-<br>value | 0,729                                    | 0,737             | 0,094                 | 0,423                   | 1,000    | 0,402                    | 0,638                    | 0,725                 | 0,438                        | 0,474                      | 0,907                      | 0,769                      | 0,861                       | 0,449              | 0,309                 | 0,663                | 0,499               |
| ALT<br>day 0                     | r-<br>value | 0,201*                                   | 0,022             | 0,029                 | 0,027                   | 0,060    | 0,045                    | 0,039                    | -0,238                | 0,041                        | -0,184                     | 0,026                      | -0,091                     | 0,067                       | 0,072              | 0,147                 | 0,066                | -0,028              |

|               |         |       |        |        |       |        |        |        |        |        |        |        |        |        |        |        |         |        |
|---------------|---------|-------|--------|--------|-------|--------|--------|--------|--------|--------|--------|--------|--------|--------|--------|--------|---------|--------|
|               | p-value | 0,040 | 0,828  | 0,771  | 0,788 | 0,552  | 0,709  | 0,750  | 0,054  | 0,763  | 0,128  | 0,829  | 0,468  | 0,625  | 0,390  | 0,082  | 0,450   | 0,782  |
| ALT<br>day 3  | r-value | 0,073 | 0,014  | -0,005 | 0,033 | 0,177  | 0,003  | 0,043  | -0,069 | -0,095 | -0,092 | 0,147  | 0,044  | -0,064 | 0,090  | 0,126  | 0,121   | 0,081  |
|               | p-value | 0,456 | 0,888  | 0,962  | 0,743 | 0,077  | 0,983  | 0,725  | 0,538  | 0,485  | 0,451  | 0,224  | 0,728  | 0,637  | 0,285  | 0,138  | 0,163   | 0,434  |
| ALT<br>day 5  | r-value | 0,120 | -0,014 | 0,013  | 0,105 | 0,153  | -0,053 | 0,041  | -0,219 | 0,043  | -0,234 | 0,023  | -0,027 | 0,007  | 0,144  | 0,199* | 0,216*  | 0,142  |
|               | p-value | 0,240 | 0,895  | 0,900  | 0,312 | 0,143  | 0,677  | 0,745  | 0,085  | 0,754  | 0,061  | 0,857  | 0,836  | 0,959  | 0,098  | 0,023  | 0,015   | 0,172  |
| ALT<br>day 10 | r-value | 0,111 | 0,236  | -0,065 | 0,061 | 0,268* | 0,096  | 0,233  | -0,275 | 0,033  | -0,062 | 0,085  | -0,186 | 0,141  | 0,218  | 0,229* | 0,259*  | 0,211  |
|               | p-value | 0,399 | 0,075  | 0,623  | 0,645 | 0,043  | 0,550  | 0,143  | 0,086  | 0,838  | 0,698  | 0,596  | 0,251  | 0,384  | 0,052  | 0,041  | 0,020   | 0,081  |
| GGT<br>day 0  | r-value | 0,047 | -0,039 | 0,045  | 0,023 | -0,059 | -0,158 | -0,076 | -0,156 | 0,038  | -0,057 | -0,148 | -0,135 | 0,023  | -0,035 | -0,034 | -0,043  | 0,022  |
|               | p-value | 0,627 | 0,694  | 0,652  | 0,817 | 0,556  | 0,193  | 0,532  | 0,211  | 0,779  | 0,637  | 0,220  | 0,281  | 0,869  | 0,673  | 0,689  | 0,617   | 0,832  |
| GGT<br>day 3  | r-value | 0,002 | -0,107 | -0,036 | 0,010 | 0,081  | -0,184 | -0,088 | -0,069 | 0,065  | -0,046 | -0,031 | 0,001  | 0,121  | 0,005  | -0,009 | 0,024   | 0,160  |
|               | p-value | 0,986 | 0,282  | 0,717  | 0,918 | 0,416  | 0,128  | 0,467  | 0,580  | 0,634  | 0,706  | 0,802  | 0,994  | 0,374  | 0,955  | 0,917  | 0,781   | 0,120  |
| GGT<br>day 5  | r-value | 0,071 | 0,052  | 0,067  | 0,126 | 0,033  | -0,100 | 0,115  | -0,113 | 0,172  | -0,098 | 0,060  | -0,021 | 0,215  | 0,158  | 0,128  | 0,074   | 0,177  |
|               | p-value | 0,486 | 0,613  | 0,516  | 0,225 | 0,751  | 0,430  | 0,360  | 0,378  | 0,208  | 0,043  | 0,635  | 0,868  | 0,115  | 0,068  | 0,141  | 0,405   | 0,086  |
| GGT<br>day 10 | r-value | 0,020 | 0,155  | -0,069 | 0,115 | 0,211  | 0,043  | 0,164  | -0,018 | 0,092  | 0,125  | 0,017  | -0,042 | 0,159  | 0,202  | 0,279* | 0,296** | 0,259* |
|               | p-value | 0,875 | 0,230  | 0,590  | 0,371 | 0,102  | 0,787  | 0,294  | 0,908  | 0,557  | 0,424  | 0,911  | 0,790  | 0,307  | 0,063  | 0,010  | 0,006   | 0,029  |
